# Supplementary material for: In vivo evaluation of an anticancer drug delivery system based on heparinized mesoporous silica nanoparticles
Source: Royal Society of Chemistry journal article supplement (doi:10.1039/c5ra01281c), 2015-01-01
Supplement: c5ra01281c1.pdf [file c5ra01281c1.pdf]

## Supplementary Information

### **In vivo evaluation of an anticancer drug delivery system based on heparinized mesoporous silica nanoparticles**

Qiang Wu,<sup>\*a</sup> Ruifang Li,<sup>\*b</sup> Chao Zhao,<sup>a</sup> Jiejie Ren,<sup>a</sup> Keyuan Du,<sup>a</sup> Baoqing Yin,<sup>a</sup> Junmin Fu,<sup>b</sup>  
Xiangjun Qiu<sup>b</sup> and Chunsheng Gao<sup>c</sup>

<sup>a</sup> College of Pharmacy, Institute of Chinese Material Medical, Henan University, Kaifeng 475004, PR China. Email: [henuwuqiang@henu.edu.cn](mailto:henuwuqiang@henu.edu.cn)

<sup>b</sup> Department of Pharmacology, Medical College, Henan University of Science and Technology, Luoyang471003, PR China. Email: [ylliruifang@163.com](mailto:ylliruifang@163.com)

<sup>c</sup> Department of Pharmaceutics, Beijing Institute of Pharmacology and Toxicology, Beijing100850, PR China.

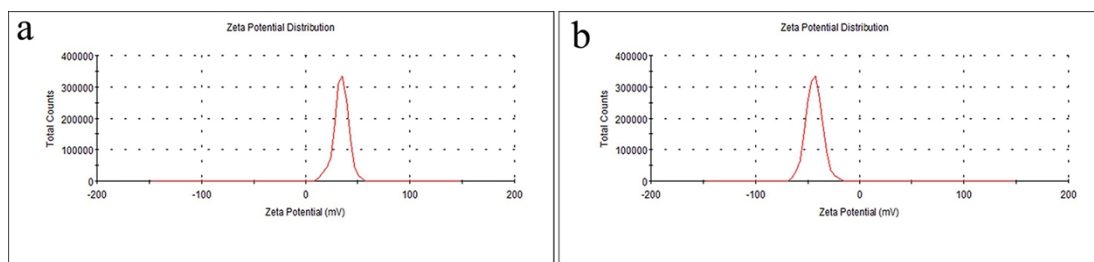

**Fig. S1** Zeta potential of MSNs-NH<sub>2</sub> (a) and MSNs-HP (b).

**Table S1** CI value of DOX in combination with MSNs-HP

| DOX<br>( $\mu\text{g} / \text{mL}$ ) | MSNs-HP<br>( $\mu\text{g} / \text{mL}$ ) | Inhibitory rate<br>(%, 48 h) | Parameters                          |       |      | CI value |
|--------------------------------------|------------------------------------------|------------------------------|-------------------------------------|-------|------|----------|
|                                      |                                          |                              | Dm<br>( $\mu\text{g} / \text{mL}$ ) | m     | r    |          |
| 0.16                                 |                                          | 18.36                        | 0.55                                | 0.89  | 0.94 |          |
| 0.31                                 |                                          | 33.53                        |                                     |       |      |          |
| 0.63                                 |                                          | 61.53                        |                                     |       |      |          |
| 1.25                                 |                                          | 74.89                        |                                     |       |      |          |
| 2.5                                  |                                          | 77.03                        |                                     |       |      |          |
|                                      | 8                                        | 3.38                         | 123.82                              | 1.109 | 0.97 |          |
|                                      | 16                                       | 14.81                        |                                     |       |      |          |
|                                      | 32                                       | 16.13                        |                                     |       |      |          |
|                                      | 64                                       | 32.33                        |                                     |       |      |          |
|                                      | 128                                      | 49.60                        |                                     |       |      |          |
| 0.16                                 | 8                                        | 26.97                        | 0.26+13.28                          | 0.866 | 0.96 | 0.92     |
| 0.31                                 | 16                                       | 62.35                        |                                     |       |      | 0.43     |
| 0.63                                 | 32                                       | 78.48                        |                                     |       |      | 0.49     |
| 1.25                                 | 64                                       | 89.66                        |                                     |       |      | 0.68     |
| 2.5                                  | 128                                      | 92.24                        |                                     |       |      | 1.25     |

Dose-effect relationships were calculated by the median-effect equation. *Dm* median-effect dose (concentration in  $\mu\text{g} / \text{mL}$  that inhibits cell growth by 50 %), *m* is the slope of the median-effect plot, *r* linear correlation coefficient of the median effect plot. CI was calculated by Chou and Talalay's CI equation.

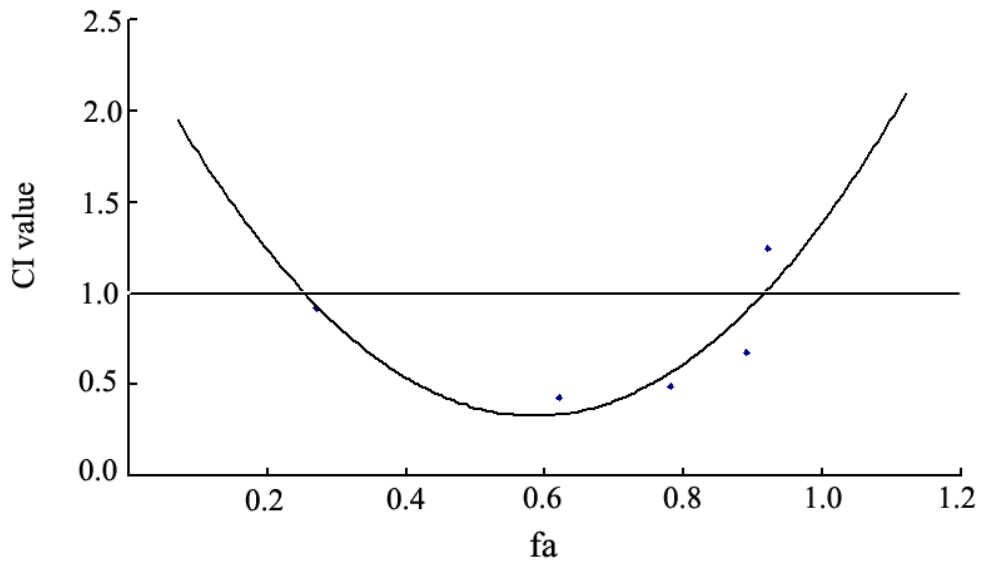

**Fig. S2** Combination index (CI) vs fraction affected (fa) plots obtained from the median-effect analysis program. Curves with solid lines are computer simulated CI-fa plots, based on the parameters ( $m$  and  $D_m$  values) for DOX and MSNs-HP combinations in H22 cell lines. Circles are actual combination data points.  $CI < 1$ ,  $= 1$  and  $> 1$  indicates synergism, additive effect and antagonism, respectively.
